# Supplementary material for: Insight into ferromagnetic interactions in CuII–LnIII dimers with a compartmental ligand
Source: Royal Society of Chemistry journal article supplement (doi:10.1039/d3dt03557c), 2023-12-27
Supplement: d3dt03557c1.pdf [file d3dt03557c1.pdf]

## Supplementary information

Anangamohan Panja<sup>a,b,\*</sup>, Sagar Paul<sup>c,\*</sup>, Eufemio Moreno-Pineda<sup>d,e</sup>, Radovan Herchel,<sup>f</sup> Narayan Ch. Jana<sup>b</sup>, Paula Brandão<sup>g</sup>, Ghenadie Novitchi<sup>h</sup> and Wolfgang Wernsdorfer<sup>c,i \*</sup>

<sup>a</sup> Department of Chemistry, Gokhale Memorial Girls' College, 1/1 Harish Mukherjee Road, Kolkata-700020, India. E-mail: ampanja@yahoo.co.in

<sup>b</sup> Department of Chemistry, Panskura Banamali College, Panskura RS, WB 721152, India

<sup>c</sup> Physikalisches Institut, Karlsruhe Institute of Technology, D-76131 Karlsruhe, Germany. E-mail: wolfgang.wernsdorfer@kit.edu

<sup>d</sup> Universidad de Panamá, Facultad de Ciencias Naturales, Exactas y Tecnología, Depto. de Química-Física, 0824 Panamá, Panamá.

<sup>e</sup> Universidad de Panamá, Facultad de Ciencias Naturales, Exactas y Tecnología, Grupo de Investigación de Materiales, 0824 Panamá, Panamá.

<sup>f</sup> Department of Inorganic Chemistry, Faculty of Science, Palacký University, 17. listopadu 12, 77146 Olomouc, Czech Republic

<sup>g</sup> Department of Chemistry, CICECO-Aveiro Institute of Materials, University of Aveiro, 3810-193 Aveiro, Portugal

<sup>h</sup> Laboratoire National des Champs Magnétiques Intenses, UPR CNRS 3228, Université Grenoble-Alpes, B.P. 166, 38042 Grenoble Cedex 9, France

<sup>i</sup> Institute for Quantum Materials and Technology (IQMT), Karlsruhe Institute of Technology (KIT), Eggenstein-Leopoldshafen D-76344, Germany; Physikalisches Institut, Karlsruhe Institute of Technology, Karlsruhe D-76131, Germany

## Table of Contents

|                                                                                                                                                                                                                                                                                                                                                                                                                                                                                                    |    |
|----------------------------------------------------------------------------------------------------------------------------------------------------------------------------------------------------------------------------------------------------------------------------------------------------------------------------------------------------------------------------------------------------------------------------------------------------------------------------------------------------|----|
| Section 1: Structural information .....                                                                                                                                                                                                                                                                                                                                                                                                                                                            | 3  |
| <b>Figure S1.</b> IR spectra of 1-4.....                                                                                                                                                                                                                                                                                                                                                                                                                                                           | 3  |
| <b>Figure S2.</b> Simulated and experimental powder X-ray pattern of <b>1-4</b> .....                                                                                                                                                                                                                                                                                                                                                                                                              | 3  |
| <b>Figure S3.</b> Crystal structures of complexes <b>1, 2</b> and <b>4</b> showing ellipsoid (30 % probability) plots together with the local coordination geometry around the Dy(III) center.....                                                                                                                                                                                                                                                                                                 | 4  |
| <b>Figure S4.</b> A representative packing diagram of supramolecular dimer of <b>3</b> showing $\pi$ - $\pi$ interaction...                                                                                                                                                                                                                                                                                                                                                                        | 4  |
| <b>Table S1.</b> Crystallographic data and structure refinement parameters of 1-4. ....                                                                                                                                                                                                                                                                                                                                                                                                            | 5  |
| <b>Table S2.</b> Bond distances around metal coordination spheres in <b>1-4</b> . ....                                                                                                                                                                                                                                                                                                                                                                                                             | 6  |
| <b>Table S3.</b> SHAPE analysis of Cu <sup>II</sup> ion in complexes <b>1-4</b> .....                                                                                                                                                                                                                                                                                                                                                                                                              | 6  |
| <b>Table S4.</b> SHAPE analysis of the Ln <sup>III</sup> ion in complexes <b>1-4</b> . ....                                                                                                                                                                                                                                                                                                                                                                                                        | 7  |
| Section 2: DFT calculations : .....                                                                                                                                                                                                                                                                                                                                                                                                                                                                | 8  |
| <b>Figure S5.</b> The BS-DFT calculated spin density distribution using PBE0 functional for dinuclear complexes of 1-4. The spin densities are represented by yellow/cyan surfaces calculated with a cutoff value of 0.01 e bohr <sup>-3</sup> . Hydrogen atoms were omitted for clarity.....                                                                                                                                                                                                      | 8  |
| <b>Figure S6.</b> The BS-DFT calculated spin density distribution using PBE0 functional for the supramolecular dimer of dinuclear complexes of 1. The spin densities are represented by yellow/cyan surfaces calculated with a cutoff value of 0.01 e bohr <sup>-3</sup> . Hydrogen atoms were omitted for clarity. Note: BS-DFT calculations were performed in such a way that only two metal ions were paramagnetic, and two other metals were replaced by diamagnetic ions (Gd→Lu, Cu→Zn). .... | 9  |
| Section 3: CASSCF simulation details.....                                                                                                                                                                                                                                                                                                                                                                                                                                                          | 10 |
| <b>Table S5:</b> CASSCF calculated ligand field $B^kq$ parameters for the Ln ion in <b>CuLn</b> systems. ....                                                                                                                                                                                                                                                                                                                                                                                      | 10 |
| <b>Table S6:</b> Computed energy levels (the ground state is set at zero) composition of the g-tensor ( $g_x, g_y, g_z$ ) and the main components (>10%) of the wavefunction for each $m_j$ state of the ground-state multiplet $^6H_{15/2}$ for the Dy ion in <b>CuDy</b> at the CASSCF level.....                                                                                                                                                                                                | 10 |
| <b>Table S7:</b> Computed energy levels (the ground state is set at zero) composition of the g-tensor ( $g_x, g_y, g_z$ ) and the main components (>10%) of the wavefunction for each $m_j$ state of the ground-state multiplet $^4I_{15/2}$ for the Er ion in <b>CuEr</b> at the CASSCF level. ....                                                                                                                                                                                               | 11 |
| Section 4: Derivative-field angle map in complex 2 (CuTb) .....                                                                                                                                                                                                                                                                                                                                                                                                                                    | 11 |
| <b>Figure S7.</b> Derivative-field angle map (in complex <b>2</b> ) obtained from angle dependent M(B) loops measured by a $\mu$ -SQUID. ....                                                                                                                                                                                                                                                                                                                                                      | 11 |

## Section 1: Structural information

This section consists of structural information of complex **1-4**. Figure S1, S2 shows experimental IR and XRD spectra of the four complexes. Figure S3, S4 show the crystal structure of **1**, **2**, **4** and crystal packing diagram of **3** respectively. Table S1-S4 show crystallographic data, bond distances and shape analysis of these complexes.

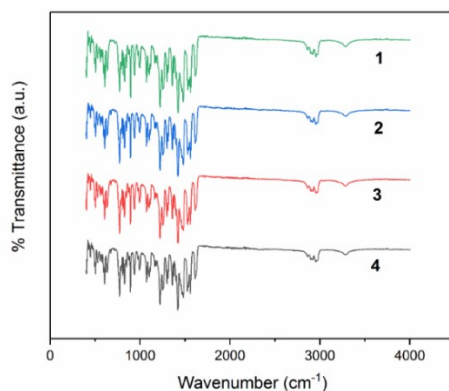

**Figure S1.** IR spectra of 1-4

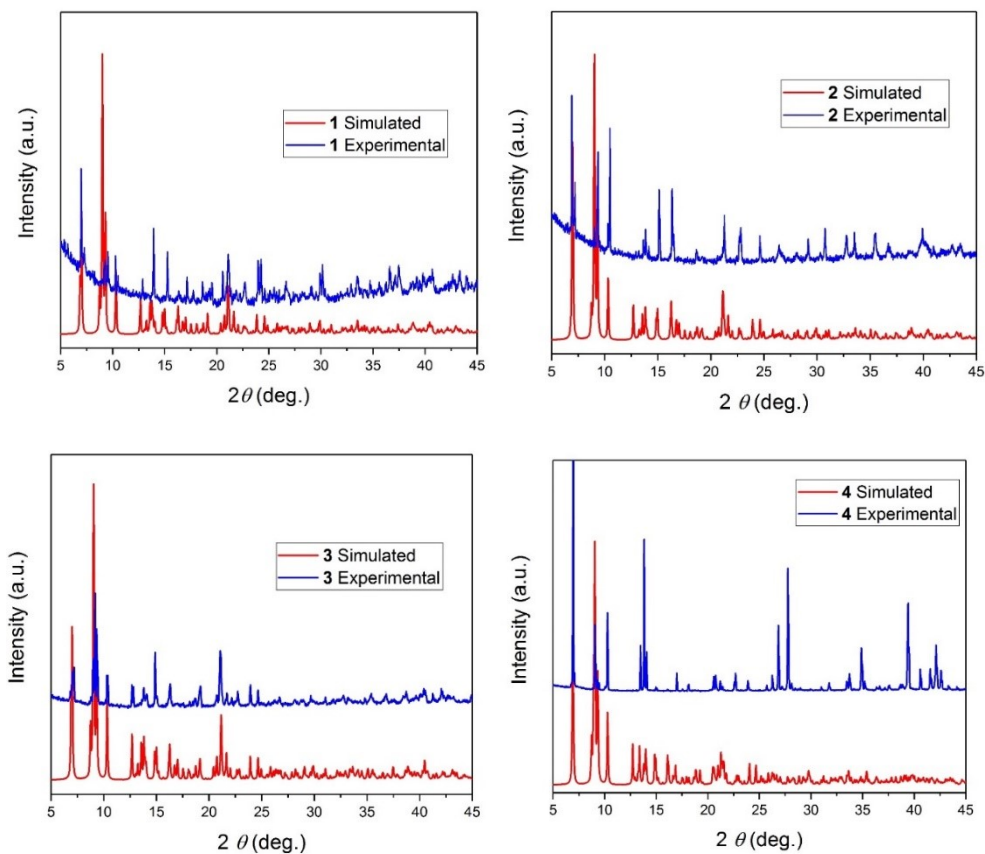

**Figure S2.** Simulated and experimental powder X-ray pattern of 1-4.

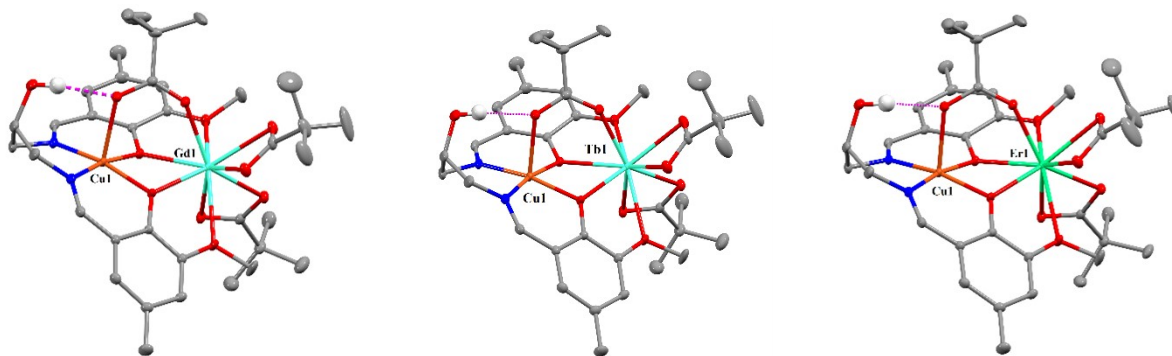

**Figure S3.** Crystal structures of complexes **1**, **2** and **4** showing ellipsoid (30 % probability) plots together with the local coordination geometry around the Dy(III) center

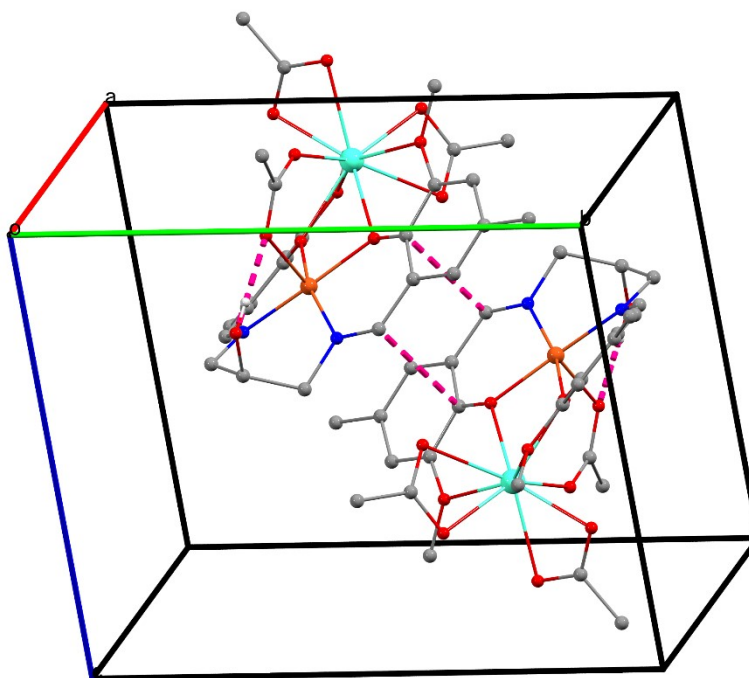

**Figure S4.** A representative packing diagram of supramolecular dimer of **3** showing  $\pi$ - $\pi$  interaction. Methyl groups of pivalate ions and most of hydrogen atoms have been omitted for clarity

**Table S1.** Crystallographic data and structure refinement parameters of 1–4.

|                                                              | <b>1</b>                                                                         | <b>2</b>                                                                        | <b>3</b>                                                                        | <b>4</b>                                                                         |
|--------------------------------------------------------------|----------------------------------------------------------------------------------|---------------------------------------------------------------------------------|---------------------------------------------------------------------------------|----------------------------------------------------------------------------------|
| Empirical formula                                            | C <sub>36</sub> H <sub>51</sub> N <sub>2</sub> O <sub>11</sub> CuGd              | C <sub>36</sub> H <sub>51</sub> N <sub>2</sub> O <sub>11</sub> CuTb             | C <sub>36</sub> H <sub>51</sub> N <sub>2</sub> O <sub>11</sub> CuDy             | C <sub>36</sub> H <sub>51</sub> N <sub>2</sub> O <sub>11</sub> CuEr              |
| Formula weight                                               | 908.57                                                                           | 910.24                                                                          | 913.82                                                                          | 918.58                                                                           |
| Temperature/K                                                | 150(2)                                                                           | 150(2)                                                                          | 150(2)                                                                          | 150(2)                                                                           |
| Crystal system                                               | triclinic                                                                        | triclinic                                                                       | triclinic                                                                       | triclinic                                                                        |
| Space group                                                  | <i>P</i> $\bar{1}$                                                               | <i>P</i> $\bar{1}$                                                              | <i>P</i> $\bar{1}$                                                              | <i>P</i> $\bar{1}$                                                               |
| <i>a</i> /Å                                                  | 11.6842(6)                                                                       | 11.6751(7)                                                                      | 11.6733(8)                                                                      | 11.6842(12)                                                                      |
| <i>b</i> /Å                                                  | 13.9182(8)                                                                       | 13.8406(9)                                                                      | 13.8531(10)                                                                     | 13.6822(14)                                                                      |
| <i>c</i> /Å                                                  | 13.9359(8)                                                                       | 13.9768(9)                                                                      | 13.9469(10)                                                                     | 14.1186(13)                                                                      |
| $\alpha$ /°                                                  | 75.986(2)                                                                        | 76.085(3)                                                                       | 76.134(2)                                                                       | 86.239(3)                                                                        |
| $\beta$ /°                                                   | 65.330(2)                                                                        | 65.374(2)                                                                       | 65.370(2)                                                                       | 65.790(3)                                                                        |
| $\gamma$ /°                                                  | 68.306(2)                                                                        | 68.336(2)                                                                       | 68.404(2)                                                                       | 68.523(3)                                                                        |
| Volume/Å <sup>3</sup>                                        | 1903.19(19)                                                                      | 1898.0(2)                                                                       | 1896.3(2)                                                                       | 1906.1(3)                                                                        |
| <i>Z</i>                                                     | 2                                                                                | 2                                                                               | 2                                                                               | 2                                                                                |
| $\rho_{\text{calc}}$ g/cm <sup>3</sup>                       | 1.584                                                                            | 1.591                                                                           | 1.600                                                                           | 1.600                                                                            |
| $\mu$ /mm <sup>-1</sup>                                      | 2.346                                                                            | 2.468                                                                           | 2.576                                                                           | 2.804                                                                            |
| <i>F</i> (000)                                               | 922.0                                                                            | 924.0                                                                           | 928.0                                                                           | 932.0                                                                            |
| 2 $\theta$ range for data collection/°                       | 4.028 to 58.528                                                                  | 4.146 to 53.004                                                                 | 4.028 to 52.878                                                                 | 5.968 to 58.372                                                                  |
| Reflections collected                                        | 101308                                                                           | 34319                                                                           | 32693                                                                           | 126257                                                                           |
| Independent reflections                                      | 10311 [ <i>R</i> <sub>int</sub> = 0.0397,<br><i>R</i> <sub>sigma</sub> = 0.0223] | 7847 [ <i>R</i> <sub>int</sub> = 0.0717,<br><i>R</i> <sub>sigma</sub> = 0.0604] | 7783 [ <i>R</i> <sub>int</sub> = 0.0436,<br><i>R</i> <sub>sigma</sub> = 0.0438] | 10258 [ <i>R</i> <sub>int</sub> = 0.0286,<br><i>R</i> <sub>sigma</sub> = 0.0122] |
| Data/restraints/parameter                                    | 10311/0/477                                                                      | 7847/6/487                                                                      | 7783/0/480                                                                      | 10258/2/501                                                                      |
| Goodness-of-fit on <i>F</i> <sup>2</sup>                     | 1.085                                                                            | 1.067                                                                           | 1.029                                                                           | 1.065                                                                            |
| Final <i>R</i> indexes [ <i>I</i> ≥ 2 $\sigma$ ( <i>I</i> )] | <i>R</i> <sub>1</sub> = 0.0238,<br><i>wR</i> <sub>2</sub> = 0.0558               | <i>R</i> <sub>1</sub> = 0.0442,<br><i>wR</i> <sub>2</sub> = 0.1096              | <i>R</i> <sub>1</sub> = 0.0307,<br><i>wR</i> <sub>2</sub> = 0.0696              | <i>R</i> <sub>1</sub> = 0.0144,<br><i>wR</i> <sub>2</sub> = 0.0377               |
| Final <i>R</i> indexes [all data]                            | <i>R</i> <sub>1</sub> = 0.0294,<br><i>wR</i> <sub>2</sub> = 0.0577               | <i>R</i> <sub>1</sub> = 0.0600,<br><i>wR</i> <sub>2</sub> = 0.1188              | <i>R</i> <sub>1</sub> = 0.0422,<br><i>wR</i> <sub>2</sub> = 0.0736              | <i>R</i> <sub>1</sub> = 0.0150,<br><i>wR</i> <sub>2</sub> = 0.0380               |
| Largest diff. peak/hole / e Å <sup>-3</sup>                  | 0.82/-0.59                                                                       | 1.92/-1.70                                                                      | 1.08/-0.73                                                                      | 0.83/-0.56                                                                       |

**Table S2.** Bond distances around metal coordination spheres in **1–4**.

| Bond    | Distances  |           |           |            |
|---------|------------|-----------|-----------|------------|
|         | 1          | 2         | 3         | 4          |
| Ln–O1   | 2.3384(15) | 2.389(3)  | 3.3969(5) | 2.2929(10) |
| Ln–O2   | 2.6525(15) | 2.505(3)  | 3.3969(5) | 2.6621(10) |
| Ln–O3   | 2.4023(15) | 2.318(3)  | 2.375(2)  | 2.3542(9)  |
| Ln–O4   | 2.5103(16) | 2.654(3)  | 2.490(2)  | 2.4745(10) |
| Ln–O6   | 2.3645(16) | 2.340(3)  | 2.330(2)  | 2.3051(10) |
| Ln–O7   | 2.4972(16) | 2.479(3)  | 2.466(2)  | 2.4423(11) |
| Ln–O8   | 2.4006(16) | 2.387(3)  | 2.373(2)  | 2.3502(10) |
| Ln–O9   | 2.4105(16) | 2.384(3)  | 2.378(2)  | 2.4369(10) |
| Ln–O10  | 2.4719(16) | 2.461(3)  | 2.449(2)  | 2.3511(11) |
| Cu–O1   | 1.9444(15) | 1.942(3)  | 1.945(2)  | 1.9468(10) |
| Cu–O3   | 1.9433(15) | 1.954(3)  | 1.941(2)  | 1.9373(10) |
| Cu–N1   | 1.988(2)   | 2.215(3)  | 1.977(3)  | 1.9839(13) |
| Cu–N2   | 1.9684(19) | 1.988(4)  | 1.970(3)  | 1.9708(12) |
| Cu–O5   | 2.2164(16) | 2.215(3)  | 2.215(3)  | 2.2114(10) |
| Ln···Cu | 3.4206(3)  | 3.4050(8) | 3.3969(5) | 3.3758(3)  |

**Table S3.** SHAPE analysis of Cu<sup>II</sup> ion in complexes **1–4**.

| Label   | Shape                          | Symmetry        | 1      | 2      | 3      | 4      |
|---------|--------------------------------|-----------------|--------|--------|--------|--------|
| PP-5    | Pentagon                       | D <sub>5h</sub> | 29.472 | 29.450 | 29.416 | 29.588 |
| vOC-5   | Vacant octahedron              | C <sub>4v</sub> | 1.319  | 1.301  | 1.339  | 1.339  |
| TBPY-5  | Trigonal bipyramid             | D <sub>3h</sub> | 4.844  | 4.873  | 4.920  | 4.905  |
| SPY-5   | Spherical square pyramid       | C <sub>4v</sub> | 1.105  | 1.114  | 1.148  | 1.146  |
| JTBPY-5 | Johnson trigonal bipyramid J12 | D <sub>3h</sub> | 7.465  | 7.517  | 7.574  | 7.554  |

**Table S4.** SHAPE analysis of the Ln<sup>III</sup> ion in complexes **1–4**.

| Label    | Shape                              | Symmetry                | <b>1 (Gd)</b> | <b>2 (Tb)</b> | <b>3 (Dy)</b> | <b>4 (Er)</b> |
|----------|------------------------------------|-------------------------|---------------|---------------|---------------|---------------|
| EP-9     | Enneagon                           | $D_{9h}$                | 35.478        | 35.364        | 35.350        | 35.025        |
| OPY-9    | Octagonal pyramid                  | $C_{8v}$                | 23.211        | 23.203        | 23.221        | 23.381        |
| HBPY-9   | Heptagonal bipyramid               | $D_{7h}$                | 17.019        | 17.064        | 17.039        | 17.165        |
| JTC-9    | Johnson triangular cupola J3       | $C_{3v}$                | 13.282        | 13.338        | 13.390        | 13.332        |
| JCCU-9   | Capped cube J8                     | $C_{4v}$                | 9.742         | 9.766         | 9.770         | 9.672         |
| CCU-9    | Spherical-relaxed capped cube      | $C_{4v}$                | 8.270         | 8.330         | 8.336         | 8.306         |
| JCSAPR-9 | Capped square antiprism J10        | $C_{4v}$                | 3.415         | 3.345         | 3.338         | 3.210         |
| CSAPR-9  | Spherical capped square antiprism  | $C_{4v}$                | 2.310         | 2.267         | 2.260         | 2.140         |
| JTCTPR-9 | Tricapped trigonal prism J51       | $D_{3h}$                | 3.848         | 3.701         | 3.652         | 3.389         |
| TCTPR-9  | Spherical tricapped trigonal prism | $D_{3h}$                | 2.630         | 2.556         | 2.520         | 2.408         |
| JTDIC-9  | Tridiminished icosahedron J63      | $C_{3v}$                | 11.468        | 11.591        | 11.657        | 11.931        |
| HH-9     | Hula-hoop                          | $C_{2v}$                | 10.825        | 10.925        | 10.912        | 10.997        |
| MFF-9    | <b>Muffin</b>                      | <b><math>C_s</math></b> | <b>2.005</b>  | <b>1.988</b>  | <b>1.989</b>  | <b>1.992</b>  |

## Section 2: DFT calculations:

The BS-DFT calculated spin density distributions are shown in the Figures S5 and S6 indicating intra and inter molecular scenario respectively.

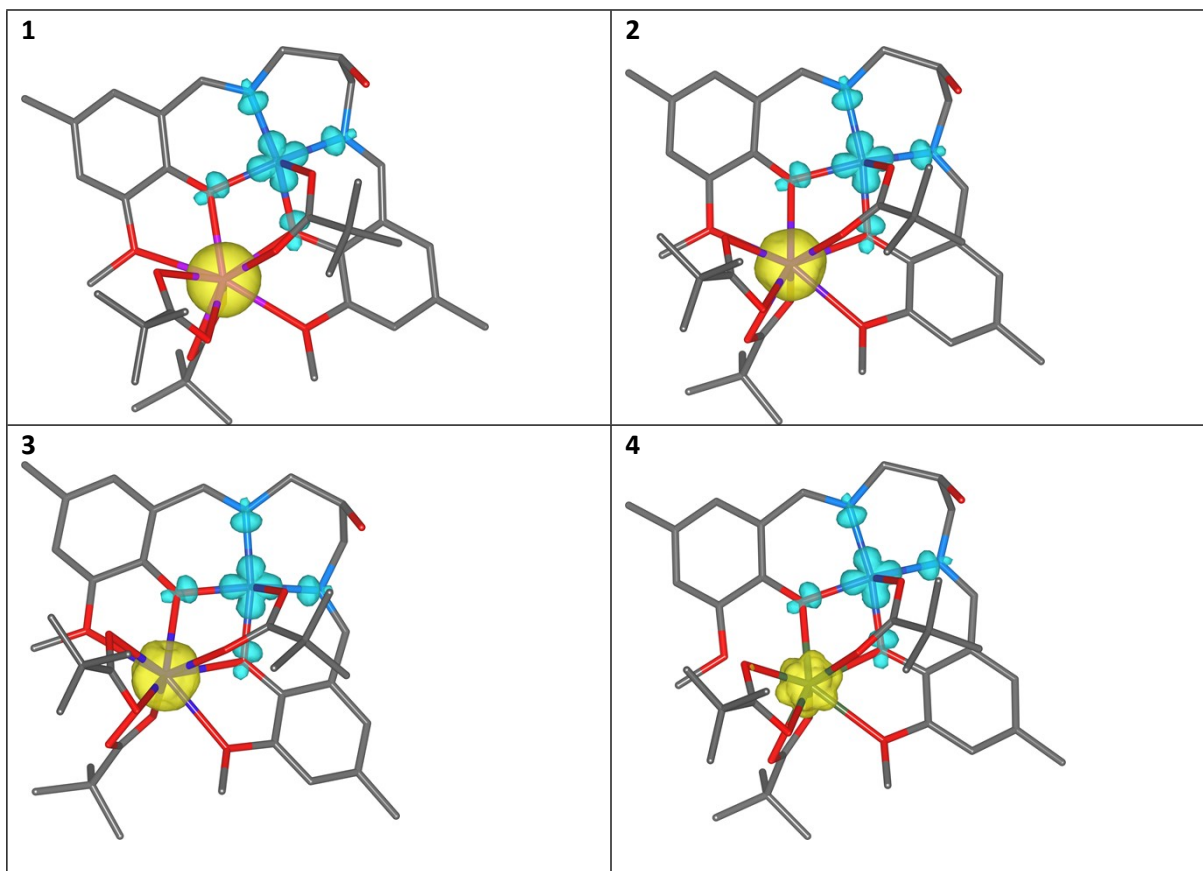

**Figure S5.** The BS-DFT calculated spin density distribution using PBE0 functional for dinuclear complexes of 1-4. The spin densities are represented by yellow/cyan surfaces calculated with a cutoff value of  $0.01 \text{ e bohr}^{-3}$ . Hydrogen atoms were omitted for clarity.



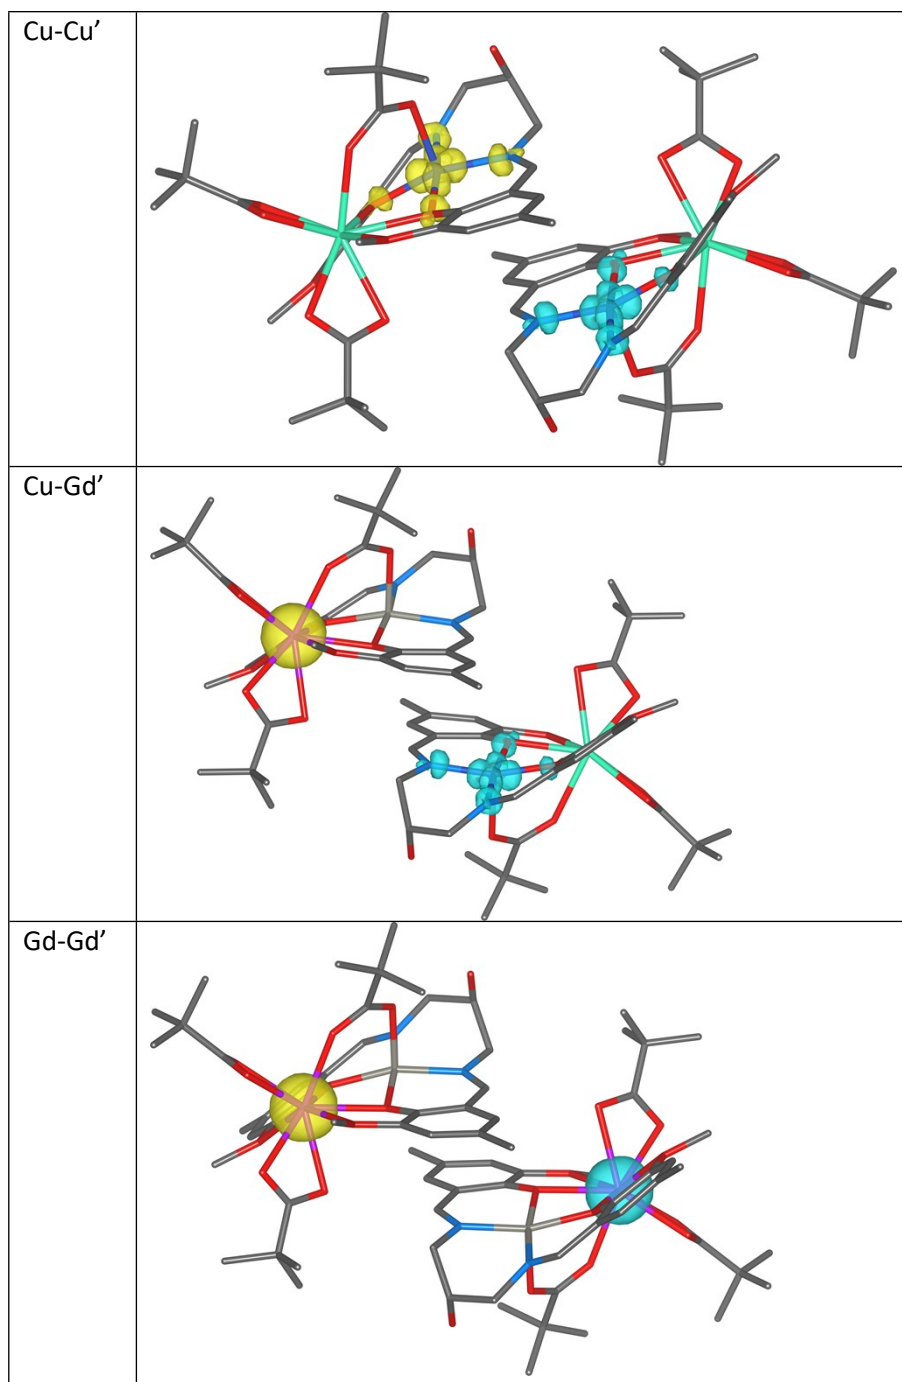

**Figure S6.** The BS-DFT calculated spin density distribution using PBE0 functional for the supramolecular dimer of dinuclear complexes of 1. The spin densities are represented by yellow/cyan surfaces calculated with a cutoff value of  $0.01 \text{ e bohr}^{-3}$ . Hydrogen atoms were omitted for clarity. Note: BS-DFT calculations were performed in such a way that only two metal ions were paramagnetic, and two other metals were replaced by diamagnetic ions (Gd $\rightarrow$ Lu, Cu $\rightarrow$ Zn).

### Section 3: CASSCF simulation details

Ligand field parameters obtained from CASSCF simulations are tabulated in Table S5, while computed energy levels, g values and the wavefunctions for each  $m_j$  state are shown in Table S6 and S7 for CuDy and CuEr complex respectively.

**Table S5:** CASSCF calculated ligand field  $B_k^q$  parameters for the Ln ion in **CuLn** systems.

| $k$ | $q$ | $B(k,q) / Tb$ | $B(k,q) / Dy$ | $B(k,q) / Er$ |
|-----|-----|---------------|---------------|---------------|
| 2   | -2  | -1.29942      | 0.11242       | 0.10119       |
| 2   | -1  | -0.15729      | 0.25614       | 1.74546       |
| 2   | 0   | -2.36779      | -1.42409      | -0.86491      |
| 2   | 1   | -1.91969      | 0.2733        | 0.03235       |
| 2   | 2   | 4.7586        | 2.99981       | -0.08627      |
| 4   | -4  | -0.01586      | 0.01367       | -0.01014      |
| 4   | -3  | -0.03091      | -0.0113       | -0.00752      |
| 4   | -2  | -0.02162      | 0.01527       | -0.00322      |
| 4   | -1  | 0.00866       | -0.00703      | 0.00536       |
| 4   | 0   | -0.00266      | 5.02644E-4    | -9.23995E-5   |
| 4   | 1   | 0.01968       | 0.0012        | -0.00576      |
| 4   | 2   | -0.0135       | -0.0016       | -9.5667E-4    |
| 4   | 3   | 0.07572       | 0.00343       | 0.03179       |
| 4   | 4   | -0.02161      | 0.00456       | -0.00414      |
| 6   | -6  | -4.84008E-5   | 9.50413E-5    | 1.59784E-4    |
| 6   | -5  | -3.65839E-4   | 8.35451E-5    | 7.08004E-4    |
| 6   | -4  | -9.39626E-5   | -1.11914E-5   | -1.18922E-4   |
| 6   | -3  | -1.37852E-4   | -1.04334E-4   | -2.01353E-4   |
| 6   | -2  | 3.80063E-5    | 8.08437E-5    | -9.32596E-5   |
| 6   | -1  | -2.29428E-4   | -6.56598E-5   | -3.98917E-4   |
| 6   | 0   | 9.01088E-6    | -7.42457E-7   | -3.09847E-5   |
| 6   | 1   | 2.70547E-4    | -1.04102E-4   | 2.0509E-5     |
| 6   | 2   | -1.79268E-4   | 3.14087E-4    | -2.0291E-4    |
| 6   | 3   | -4.0726E-4    | 1.63451E-4    | -2.04984E-4   |
| 6   | 4   | 3.29518E-5    | -4.96579E-5   | -4.36065E-5   |
| 6   | 5   | 4.77047E-4    | -1.33681E-4   | 7.89623E-4    |
| 6   | 6   | -1.26735E-4   | 4.00246E-5    | -4.96148E-4   |

**Table S6:** Computed energy levels (the ground state is set at zero) composition of the g-tensor ( $g_x$ ,  $g_y$ ,  $g_z$ ) and the main components (>10%) of the wavefunction for each  $m_j$  state of the ground-state multiplet  ${}^6H_{15/2}$  for the Dy ion in **CuDy** at the CASSCF level.

| $Energy (cm^{-1})$ | $g_x$  | $g_y$  | $g_z$   | $Wavefunction$                                                       |
|--------------------|--------|--------|---------|----------------------------------------------------------------------|
| 0                  | 0.0252 | 0.0427 | 18.2423 | 68% $ \pm 15/2\rangle + 28\%  \pm 11/2\rangle$                       |
| 73.0               | 0.4359 | 0.9219 | 14.8378 | 59% $ \pm 13/2\rangle + 22\%  \pm 9/2\rangle$                        |
| 114.8              | 0.0072 | 1.3945 | 16.7622 | 11% $ \pm 5/2\rangle + 27\%  \pm 1/2\rangle$                         |
| 195.4              | 4.0781 | 6.1394 | 10.7624 | 29% $ \pm 11/2\rangle + 26\%  \pm 7/2\rangle + 11\%  \pm 5/2\rangle$ |
| 222.1              | 0.1329 | 4.2544 | 11.1130 | 16% $ \pm 11/2\rangle + 15\%  \pm 9/2\rangle + 12\%  \pm 7/2\rangle$ |
| 264.2              | 1.9653 | 2.8447 | 14.1885 | 15% $ \pm 11/2\rangle + 20\%  \pm 9/2\rangle + 10\%  \pm 7/2\rangle$ |
| 311.9              | 0.8042 | 0.9839 | 16.6783 | 21% $ \pm 7/2\rangle + 29\%  \pm 5/2\rangle + 20\%  \pm 3/2\rangle$  |
| 491.9              | 0.0055 | 0.0140 | 19.8298 | 15 $ \pm 5/2\rangle + 43\%  \pm 1/2\rangle + 31\%  \pm 3/2\rangle$   |

**Table S7:** Computed energy levels (the ground state is set at zero) composition of the g-tensor ( $g_x, g_y, g_z$ ) and the main components ( $>10\%$ ) of the wavefunction for each  $m_j$  state of the ground-state multiplet  $^4I_{15/2}$  for the Er ion in **CuEr** at the CASSCF level.

| <i>Energy (cm<sup>-1</sup>)</i> | <i>g<sub>x</sub></i> | <i>g<sub>y</sub></i> | <i>g<sub>z</sub></i> | <i>Wavefunction</i>                                                                     |
|---------------------------------|----------------------|----------------------|----------------------|-----------------------------------------------------------------------------------------|
| 0                               | 1.1647               | 2.9271               | 14.1239              | 57% $ \pm 15/2\rangle + 20\%  \pm 11/2\rangle$                                          |
| 34.6                            | 0.4313               | 2.2900               | 13.2683              | 23% $ \pm 15/2\rangle + 25\%  \pm 9/2\rangle + 10  \pm 7/2\rangle$                      |
| 92.0                            | 0.7777               | 1.5643               | 12.6179              | 23% $ \pm 13/2\rangle + 14\%  \pm 9/2\rangle + 22  \pm 7/2\rangle$                      |
| 128.1                           | 2.2953               | 6.3282               | 8.7334               | 22% $ \pm 13/2\rangle + 12\%  \pm 5/2\rangle + 17  \pm 3/2\rangle$                      |
| 190.7                           | 1.2567               | 3.4086               | 8.7992               | 14% $ \pm 11/2\rangle + 21\%  \pm 9/2\rangle + 11  \pm 5/2\rangle + 13  \pm 1/2\rangle$ |
| 211.0                           | 0.6385               | 1.6969               | 7.6003               | 12% $ \pm 13/2\rangle + 10\%  \pm 7/2\rangle + 14  \pm 5/2\rangle + 16  \pm 3/2\rangle$ |
| 268.4                           | 3.1063               | 4.3425               | 6.9089               | 19% $ \pm 11/2\rangle + 14\%  \pm 7/2\rangle + 18  \pm 5/2\rangle + 20  \pm 3/2\rangle$ |
| 328.5                           | 1.0319               | 2.5268               | 13.3377              | 15% $ \pm 11/2\rangle + 15\%  \pm 9/2\rangle + 10  \pm 3/2\rangle + 30  \pm 1/2\rangle$ |

#### Section 4: Derivative-field angle map in complex 2 (CuTb)

The  $\mu$ -SQUID measurement setup equipped with 3D vector magnet allows angle dependent  $M(B)$  with an angular precision better than  $0.1^\circ$  without manually rotating the sample. However, the external field direction is confined within the  $\mu$ -SQUID plane to avoid flux due to the external field and measure magnetic signal coming only from the single crystal. Figure S7 shows derivative  $dM/dB$  mapped with direction of applied field ( $B_x, B_y$ ) as derived from experimental  $M(B)$  curves (positive cycle) measured at different angles of external field. The observed parallel lines indicate the switching fields between antiferromagnetic (AFM) to ferromagnetic (FM) state. Only one pair of lines confirm a single easy axis for the FM/AFM ordering.

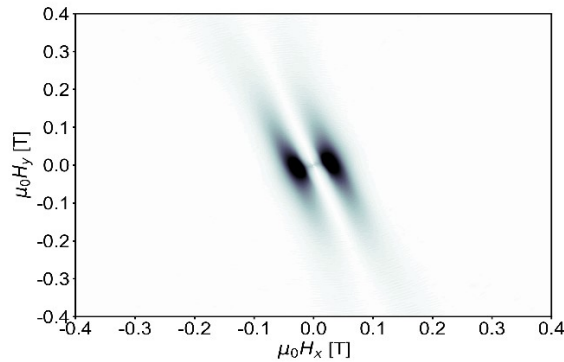

**Figure S7.** Derivative-field angle map (in complex 2) obtained from angle dependent  $M(B)$  loops measured by a  $\mu$ -SQUID.
